# Supplementary material for: Clinical Practice Use of Liquid Biopsy to Identify RAS/BRAF Mutations in Patients with Metastatic Colorectal Cancer (mCRC): A Single Institution Experience
Source: PubMed Central journal article supplement (PMC6827157; doi:10.3390/cancers11101504), 2019-10-08

# Clinical Practice Use of Liquid Biopsy to Identify *RAS/BRAF* Mutations in Patients with Metastatic Colorectal Cancer (mCRC): A Single Institution Experience

Pietro Paolo Vitiello, Vincenzo De Falco, Emilio Francesco Giunta, Davide Ciardiello, Claudia Cardone, Pasquale Vitale, Nicoletta Zanaletti, Carola Borrelli, Luca Poliero, Marinella Terminiello, Gianluca Arrichiello, Vincenza Caputo, Vincenzo Famiglietti, Valentina Mattera Iacono, Francesca Marrone, Alessandra Di Liello, Giulia Martini, Stefania Napolitano, Michele Caraglia, Angela Lombardi, Renato Franco, Ferdinando De Vita, Floriana Morgillo, Teresa Troiani, Fortunato Ciardiello and Erika Martinelli

Table S1. Patients' clinical characteristics across the three cohorts used in the analyses.

| Patients' Characteristics           | Global Cohort<br><i>n</i> (%) | Basal Cohort<br><i>n</i> (%) | Post-EGFR Cohort<br><i>n</i> (%) |
|-------------------------------------|-------------------------------|------------------------------|----------------------------------|
| <b>Sex:</b>                         |                               |                              |                                  |
| Male                                | 36(50%)                       | 20(47%)                      | 16(53%)                          |
| Female                              | 36(50%)                       | 22(53%)                      | 14(47%)                          |
| <b>Age:</b>                         |                               |                              |                                  |
| <65                                 | 34(47%)                       | 19(45%)                      | 15(50%)                          |
| ≥65                                 | 38(53%)                       | 23(55%)                      | 15(50%)                          |
| <b>ECOG Performance status:</b>     |                               |                              |                                  |
| 0                                   | 46(64%)                       | 27(64%)                      | 19(63%)                          |
| 1                                   | 18(25%)                       | 11(26%)                      | 7(24%)                           |
| ≥2                                  | 8(11%)                        | 4(10%)                       | 4(13%)                           |
| <b>Primary tumour:</b>              |                               |                              |                                  |
| Right colon (including transverse)  | 16(22%)                       | 11(26%)                      | 5(17%)                           |
| Left colon                          | 40(56%)                       | 18(43%)                      | 22(73%)                          |
| Rectum                              | 16(22%)                       | 13(31%)                      | 3(10%)                           |
| <b>Metastatic sites:</b>            |                               |                              |                                  |
| Liver                               | 49(68%)                       | 26(62%)                      | 23(77%)                          |
| Lungs                               | 32(44%)                       | 18(43%)                      | 14(47%)                          |
| Nodes                               | 40(56%)                       | 21(50%)                      | 19(63%)                          |
| Peritoneum                          | 14(19%)                       | 11(26%)                      | 5(17%)                           |
| Others                              | 12(17%)                       | 5(12%)                       | 7(23%)                           |
| <b>N° of metastatic sites:</b>      |                               |                              |                                  |
| <3                                  | 52(72%)                       | 34(81%)                      | 18(60%)                          |
| ≥3                                  | 20(28%)                       | 8(19%)                       | 12(40%)                          |
| <b>LDH (lactate dehydrogenase):</b> |                               |                              |                                  |
| <ULN                                | 38(53%)                       | 26(62%)                      | 12(40%)                          |
| ≥ULN                                | 34(47%)                       | 16(38%)                      | 18(60%)                          |
| <b>ALP (alkaline phosphatase):</b>  |                               |                              |                                  |
| <ULN                                | 41(57%)                       | 27(64%)                      | 16(53%)                          |
| ≥ULN                                | 31(43%)                       | 17(36%)                      | 14(47%)                          |

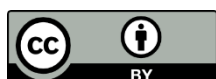

Supplement: cancers-11-01504-s001.pdf [file cancers-11-01504-s001.pdf]
